# Supplementary material for: Hepatitis C Core Protein Induces a Genotype-specific Susceptibility of Hepatocytes to TNF-induced Death <em>in </em><em>vitro</em> and <em>in vivo</em>
Source: Preprints.org preprint supplement (doi:10.20944/preprints202209.0079.v1), 2022-09-06
Supplement: Supplementary file 1 [file Supplementary.docx]

Supplementary figure


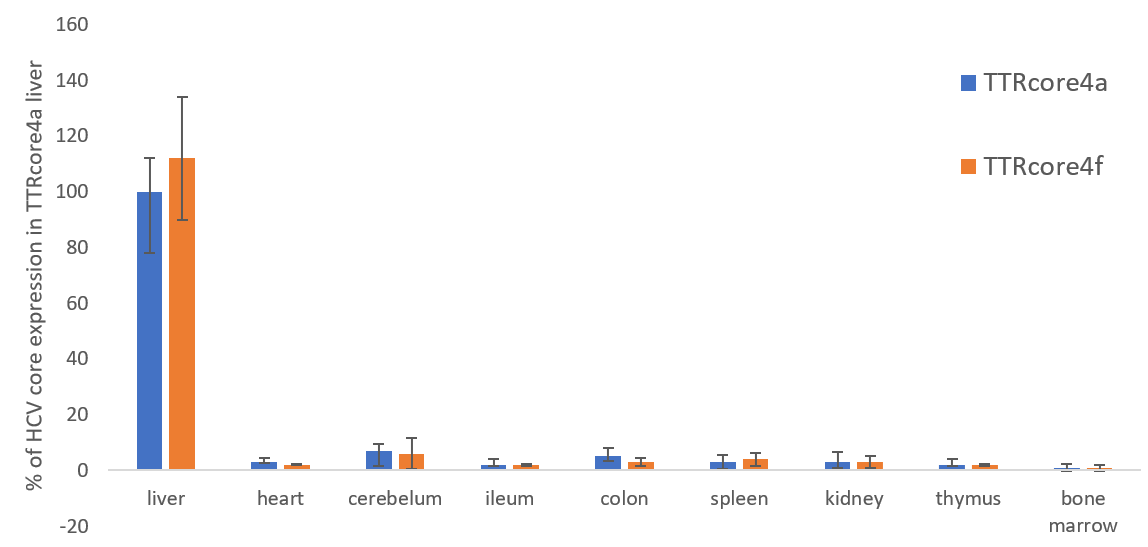


**Figure S1.** HCV core mRNA expression in various tissues for the assessment of tissue specificity of the expression. Real time RT-PCR and ΔΔCt using GAPDH as normalizer was used to estimate relative expression of HCV mRNA in tissues of the TTRcore4a and TTRcore4f transgenic mice.

Supplementary table

**Table S1.** Oligonucleotide primers for real time RT-PCR used for the verification of the differentially expressed genes in transgenic mice.

| Gene symbol | Forward primer | Reverse primer |
| --- | --- | --- |
| ADAMDEC1 | CCTGGGACTTCTCGGCTAC | TTCGTGAGGCTTTAACTCGGG |
| SAA1 | AAGCTAACTGGAAAAACTCA | TCAGCCATGGTGTCCTCGTGT |
| SAA1 | AAGCTGGCTGGAAAGATGGA | TCAGCCATGGTGTCCTCGTGT |
| MT1 | AAGAGTGAGTTGGGACACCTT | CGAGACAATACAATGGCCTCC |
| MT2 | GCCTGCAAATGCAAACAATGC | AGCTGCACTTGTCGGAAGC |
| GSN | TCACGGGTGATGCCTATGTCA | AGCCAATAGTGGAGGTCATACTG |
| HAMP | CTGAGCAGCACCACCTATCTC | TGGCTCTAGGCTATGTTTTGC |
| HAMP2 | CTGAGCAGCACCACCTATCTC | GGCTCTAGGCTCTCTATTCTTCA |
| GAPDH | AGGTCGGTGTGAACGGATTTG | TGTAGACCATGTAGTTGAGGTCA |
